# Supplementary material
Source: Springer Nature journal article supplement (https://www.springermedizin.de/resource/supplementary/12889_2009_3035_MOESM3_ESM.pdf/9487894)

% clinically  
burned out

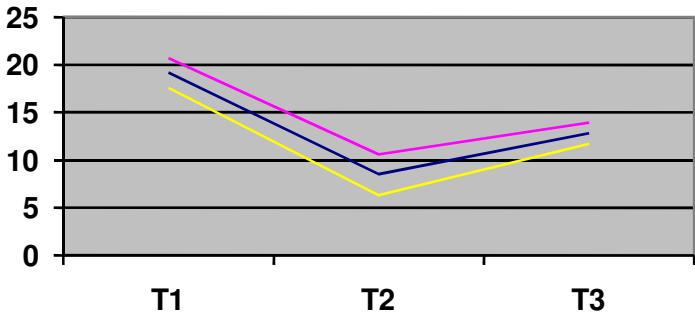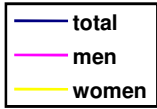

Supplement: MOESM3 [file 9487894]
